# Supplementary material
Source: PubMed Central journal article supplement (PMC7483193)

Online Supplemental Materials

Figure S1. Funnel Plot Assessing Small-Study Effects for Pain Intensity ( $k = 15$ )

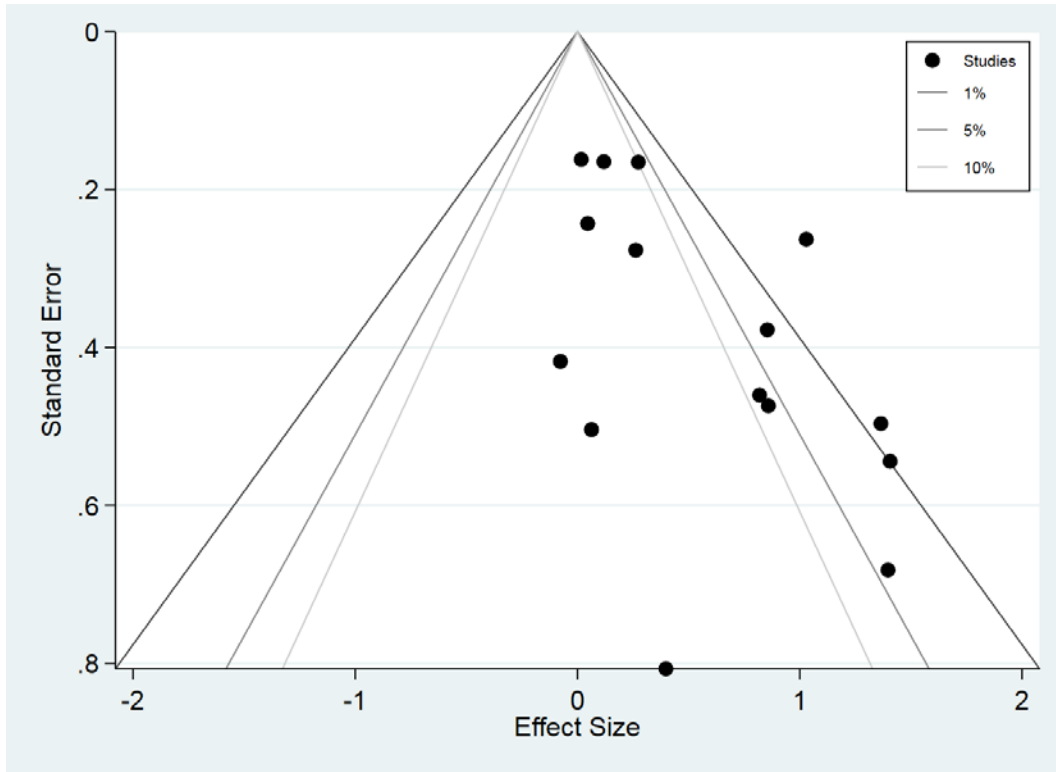

Figure S2. Funnel Plot Assessing Small-Study Effects for Physical Functioning ( $k = 11$ )

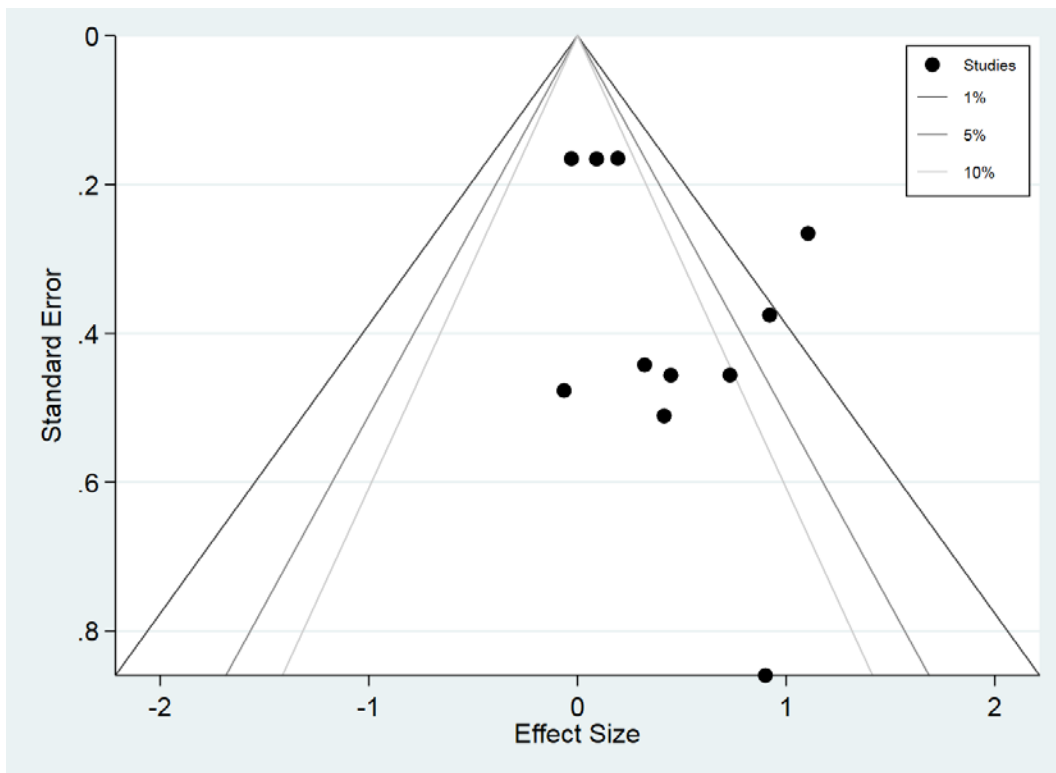

Supplement: NIHMS1567251-supplement-Supplemental_Material_2.pdf [file NIHMS1567251-supplement-Supplemental_Material_2.pdf]
